# Supplementary material for: A novel route for preparation of Ti-containing mesoporous silica with high catalytic performance by using a molecular precursor tetrakis(tris-tert-butoxysiloxy)titanium
Source: Royal Society of Chemistry journal article supplement (doi:10.1039/c2ta01369j), 2012-12-12
Supplement: c2ta01369j.pdf [file c2ta01369j.pdf]

## Electronic Supplementary Information

### A Novel Route for Preparation of Ti-Containing Mesoporous Silica with High Catalytic Performance by Using a Molecular Precursor Tetrakis(tris-*tert*-butoxysiloxy)titanium

Kwang-Min Choi,<sup>a</sup> Toshiyuki Yokoi,<sup>c</sup> Takashi Tatsumi<sup>c</sup> and Kazuyuki Kuroda<sup>\*a,b</sup>

<sup>a</sup> Department of Applied Chemistry, Faculty of Science & Engineering, Waseda University, Ohkubo 3-4-1, Shinjuku-ku, Tokyo, 169-8555, Japan. Fax: +81 3 5286 3199; Tel: +81 3 5286 3199; E-mail: kuroda@waseda.jp

<sup>b</sup> Kagami Memorial Research Institute for Materials Science and Technology, Waseda University, Nishiwaseda 2-8-26, Shinjuku-ku, Tokyo 169-0051, Japan

<sup>c</sup> Chemical Resources Laboratory, Tokyo Institute of Technology, 4259 Nagatsuta, Midori-ku, Yokohama 226-8503, Japan.

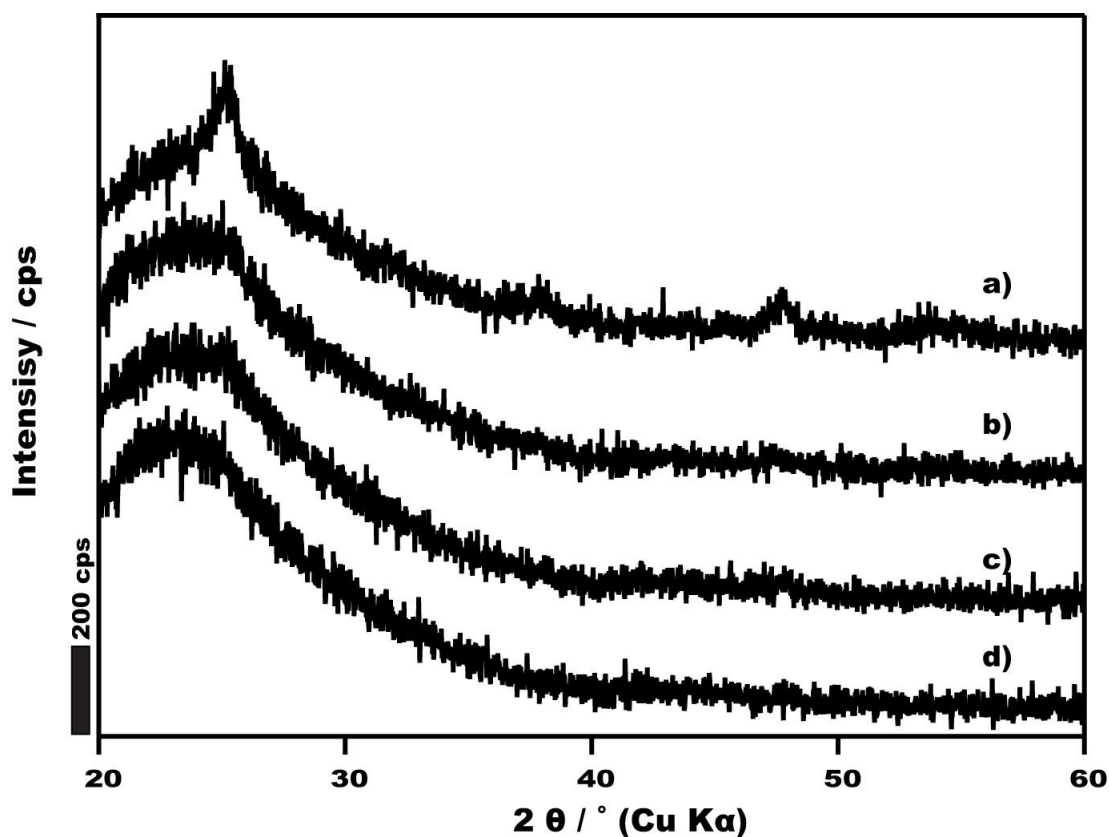

Figure S1 Wide angle XRD patterns of a) TMS-TS4-4, b) TMS-TS4-28, c) TMS-TS4-51, and d) TMS-TS4-121.

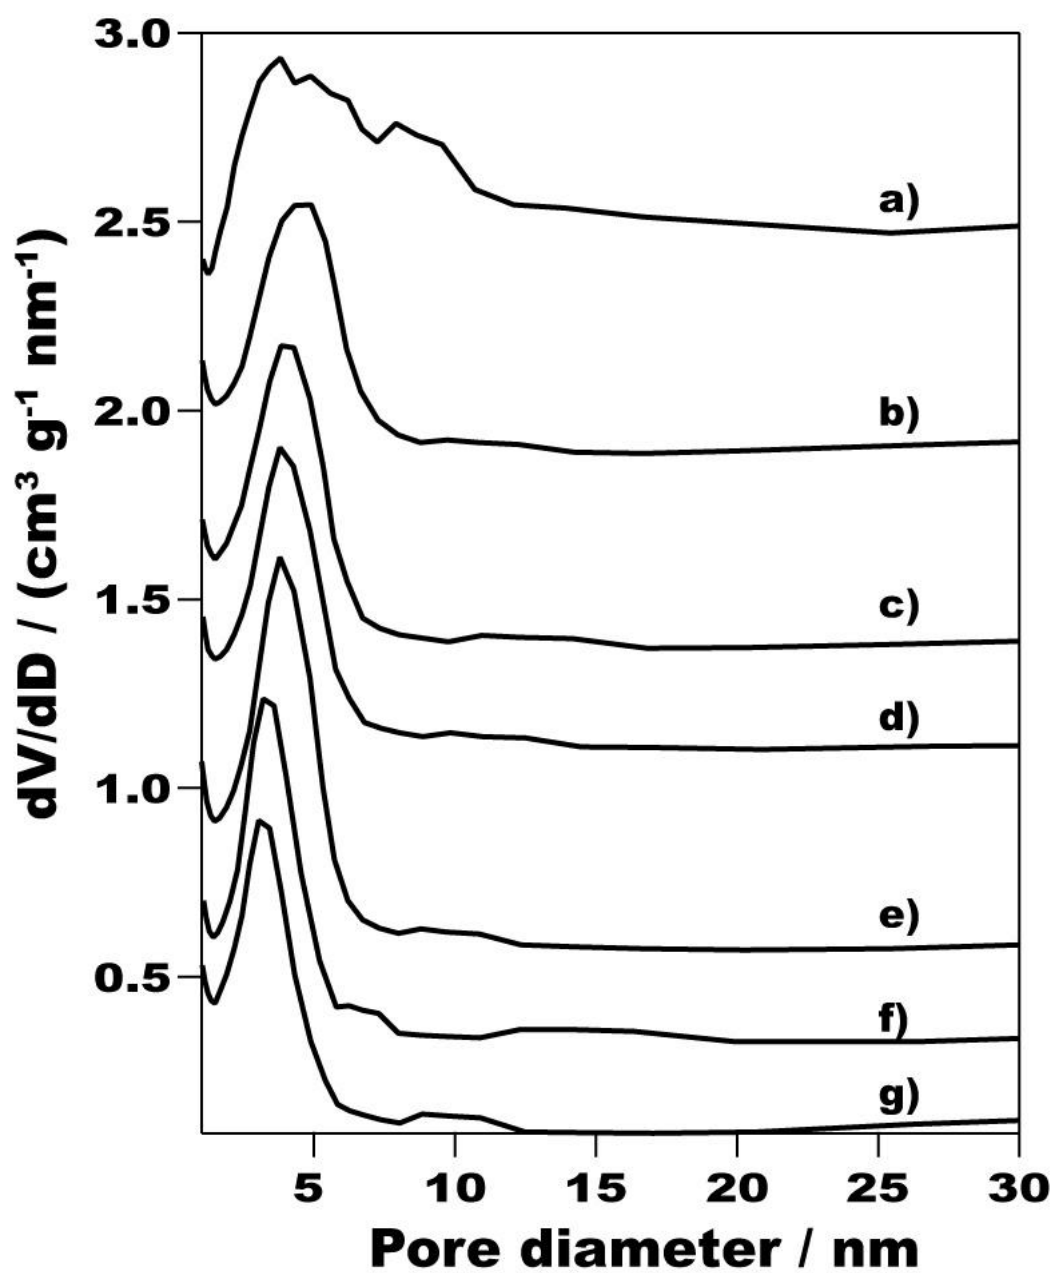

Figure S2 Pore size distributions (BJH method) of a) TMS-TS4-4 (Si/Ti=4), b) TMS-TS4-28 (Si/Ti=28), c) TMS-TS4-51 (Si/Ti=51), d) TMS-TS4-121 (Si/Ti=121), e) TMS-TS4-188 (Si/Ti=188), f) TMS-TS4-367 (Si/Ti=367), and g) TMS-TS4-736 (Si/Ti=736).

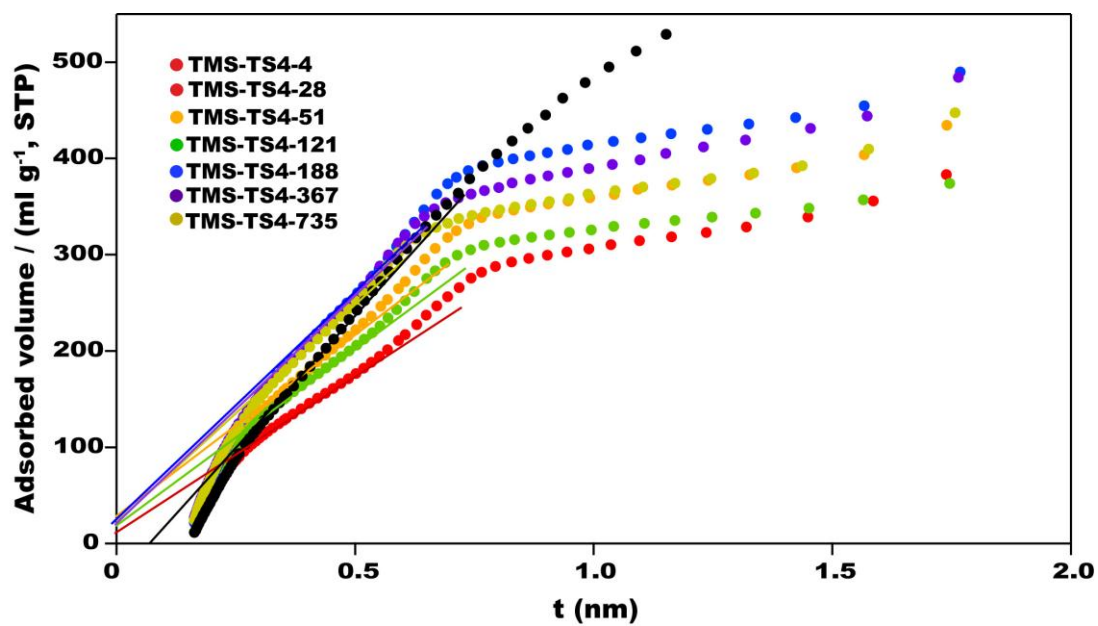

Figure S3 Comparative t-plots of the N<sub>2</sub> adsorption at 77K on TMS-TS4-x.

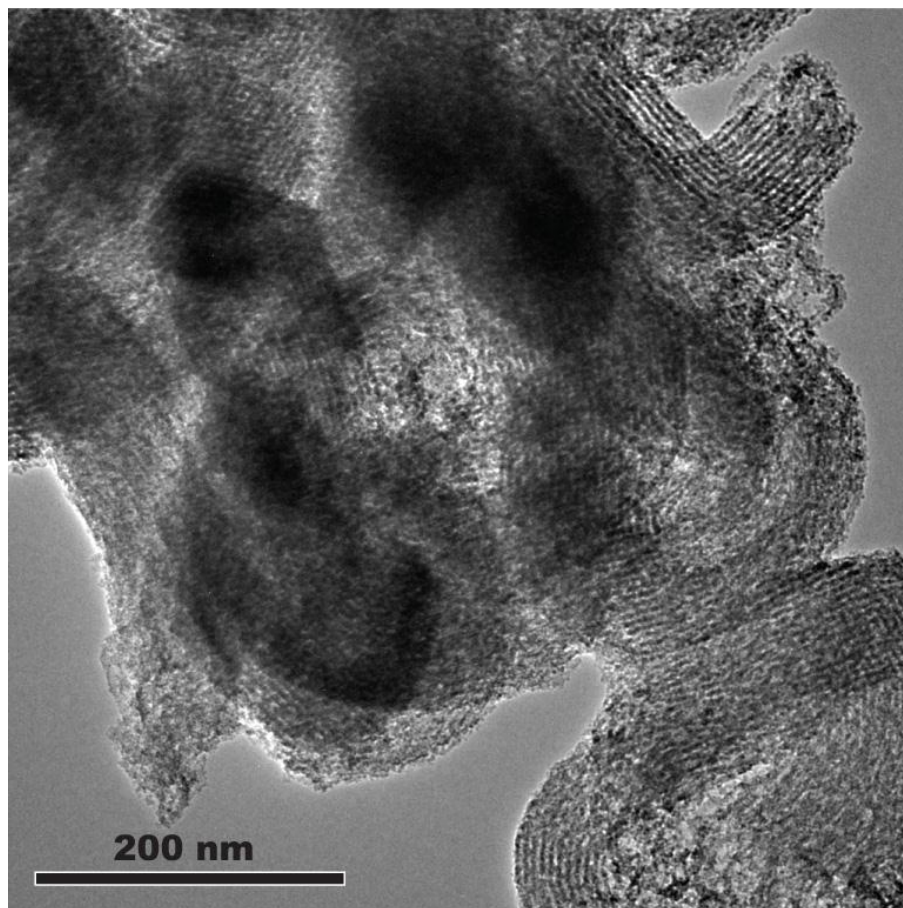

Figure S4 TEM image of TMS-TS4-367.
